# Supplementary material
Source: Springer Nature journal article supplement (https://www.springermedizin.de/resource/supplementary/12887_2011_578_MOESM3_ESM.pdf/9475450)
Supplement: MOESM3 [file 9475450]

**Eligibility Screening & Consent**

**Not eligible,  
Not consenting**

**Baseline Assessment**

**Randomization**

**SC Group**

**FNI Group**

**Meetings**

In hospital  
RA meeting with mother 1x/week to collect logs

**Sessions**

In hospital  
Calming cycle instructions, at least 4x/week

**In hospital measures**

34 wks PMA - EEG 1  
36 wks PMA - EEG 2 & NNNS

**In hospital measures**

34 wks PMA - EEG 1  
36 wks PMA - EEG 2 & NNNS

**Discharge from NICU**

Typically between 35-38 wks PMA

**Discharge from NICU**

Typically between 35-38 wks PMA

**Follow-up Clinic Assessments**

40 wks PMA - EEG 3 & NNNS  
4 mo CA - infant cortisol & HRV;  
mother cortisol; mother CES-D  
18 mo CA - Bayley-III

**Follow-up Clinic Assessments**

40 wks PMA - EEG 3 & NNNS  
4 mo CA - infant cortisol & HRV;  
mother cortisol; mother CES-D  
18 mo CA - Bayley-III
